# Supplementary material
Source: PubMed Central journal article supplement (PMC10681320)
Supplement: NIHMS1944606-supplement-Source_Data_Figs.pdf [file NIHMS1944606-supplement-Source_Data_Figs.pdf]

Figure 1f (left)

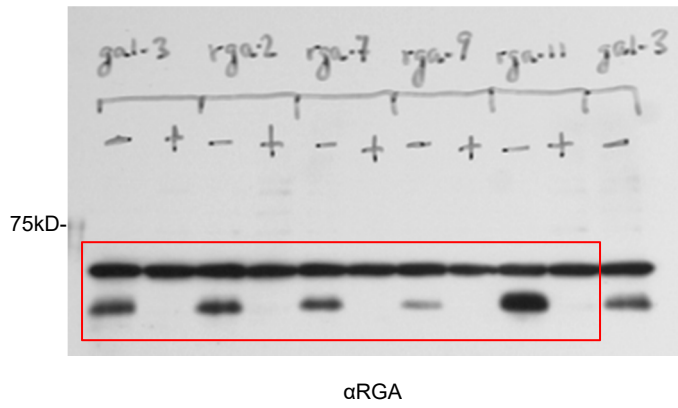

Figure 1f (right)

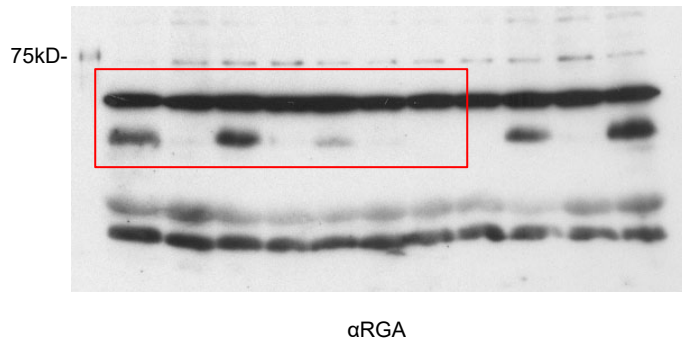

**Original Western blots for Figure 1.** Boxed areas indicate the lanes/protein bands shown in Figure 1f.

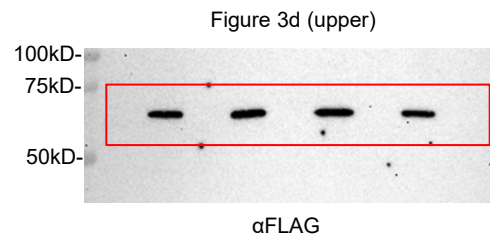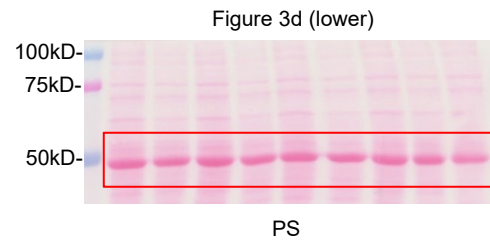

**Original Western blots for Figure 3.** Boxed areas indicate the lanes/protein bands shown in Figure 3d.

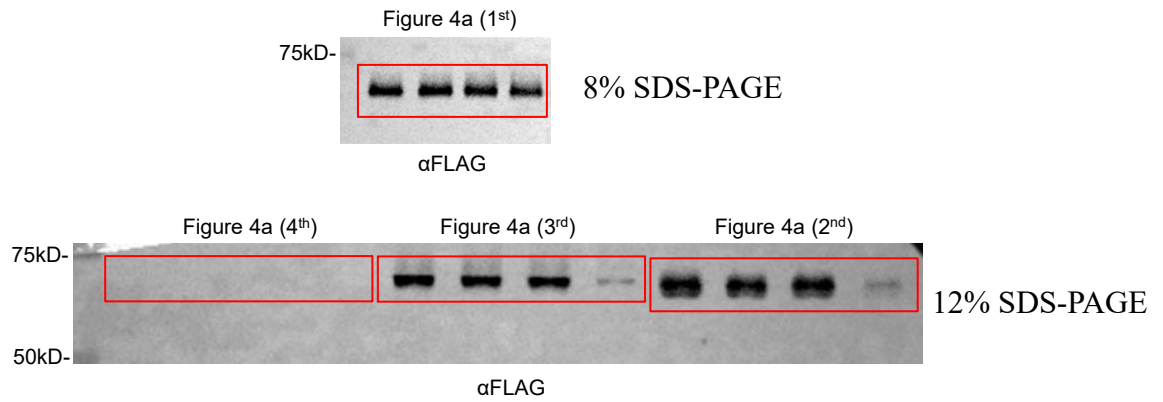

**Original Western blots for Figure 4.** Boxed areas indicate the lanes/protein bands shown in Figure 4a.

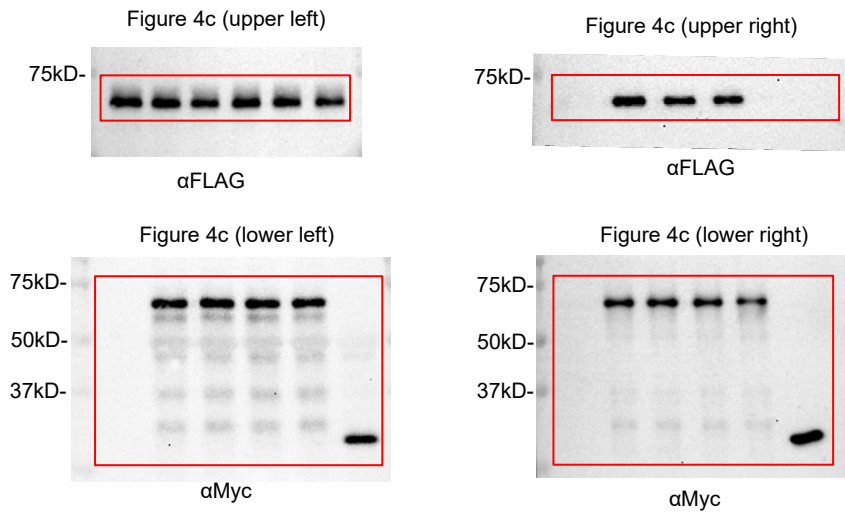

**Original Western blots for Figure 4.** Boxed areas indicate the lanes/protein bands shown in Figure 4c.

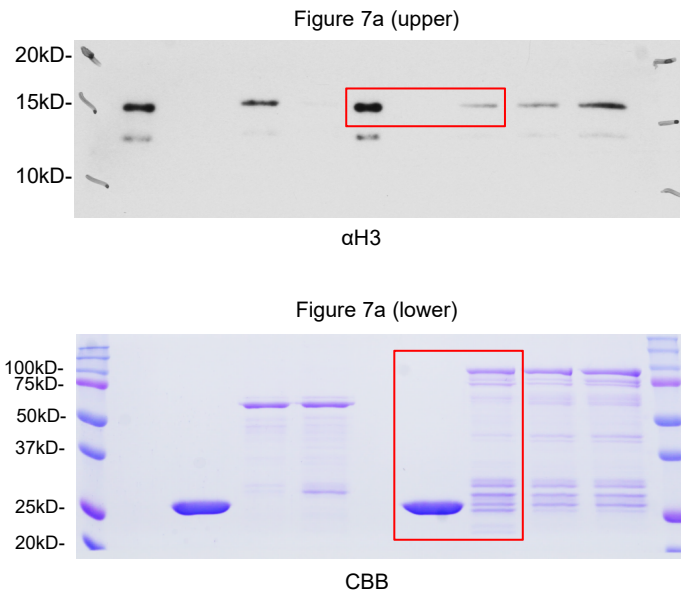

**Original Western blots for Figure 7. Boxed areas indicate the lanes/protein bands shown in Figure 7a.**

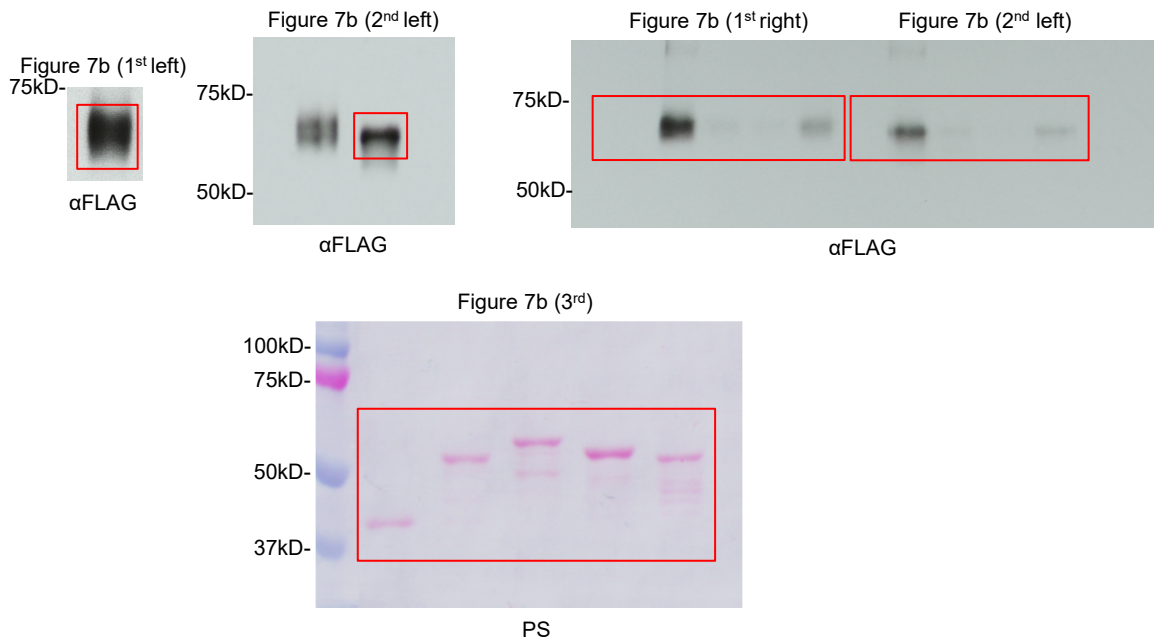

**Original Western blots for Figure 7. Boxed areas indicate the lanes/protein bands shown in Figure 7b.**

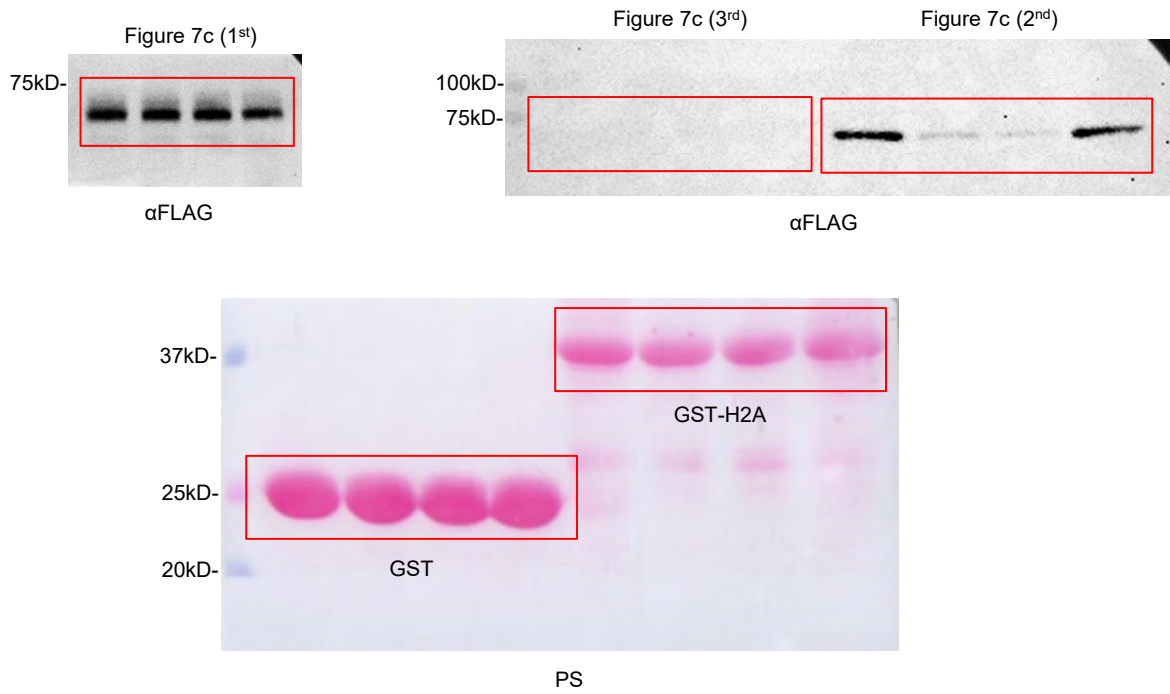

**Original Western blots for Figure 7. Boxed areas indicate the lanes/protein bands shown in Figure 7c.**

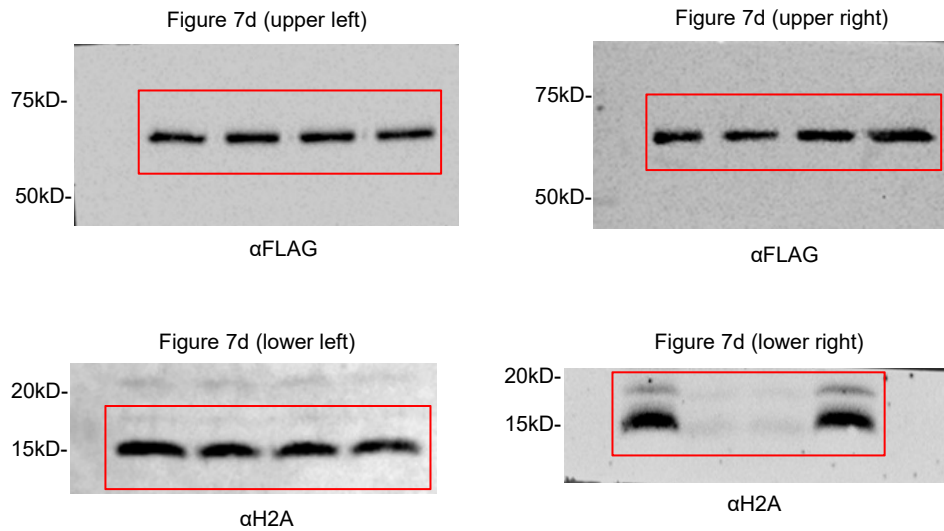

**Original Western blots for Figure 7. Boxed areas indicate the lanes/protein bands shown in Figure 7d.**

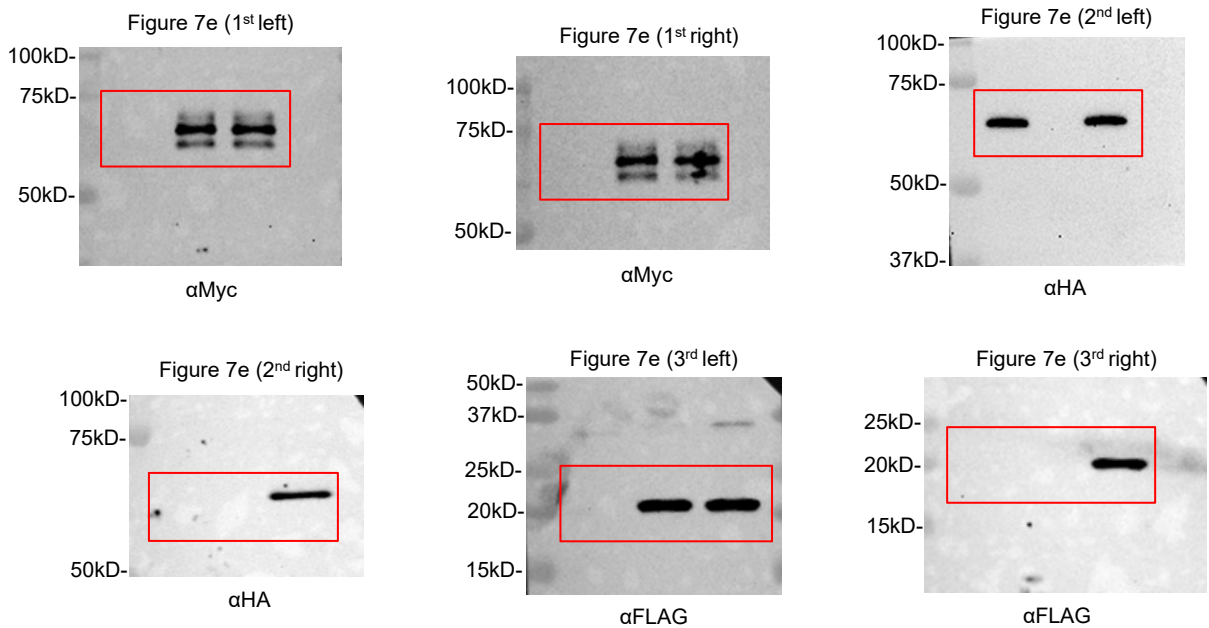

**Original Western blots for Figure 7.** Boxed areas indicate the lanes/protein bands shown in Figure 7e.

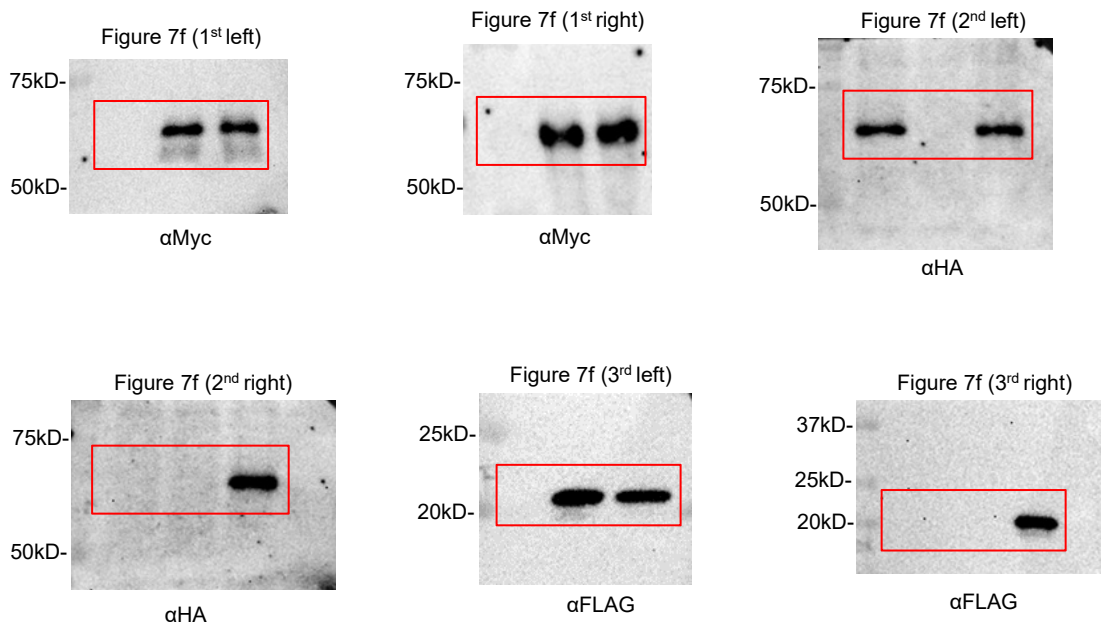

**Original Western blots for Figure 7.** Boxed areas indicate the lanes/protein bands shown in Figure 7f.
