# Supplementary material
Source: PubMed Central journal article supplement (PMC10681320)
Supplement: NIHMS1944606-supplement-Supplementary_Information.pdf [file NIHMS1944606-supplement-Supplementary_Information.pdf]

## Supplementary Figure 1

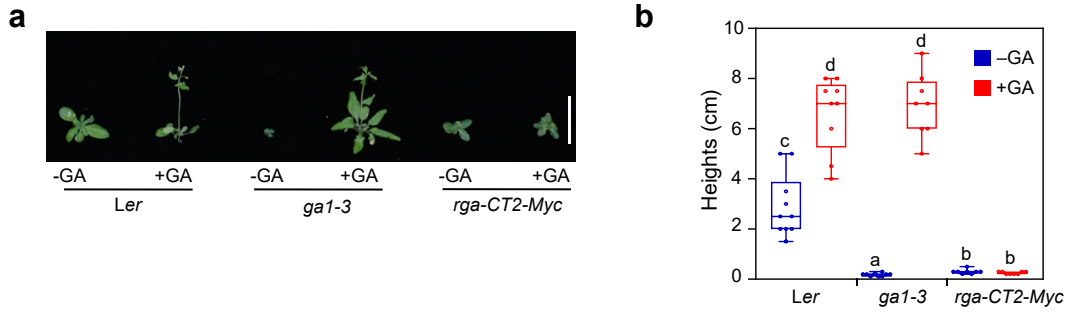

**Supplementary Figure 1.**  $P_{RGA}:rga-CT2-Myc$  conferred GA-unresponsive dwarf phenotype. **a**, Representative 34-d-old *Ler* (WT), *gal1-3* and a  $P_{RGA}:rga-CT2-Myc$  line after weekly treatments with 100  $\mu\text{M}$   $\text{GA}_3$  (+) or mock (-) as labeled. Bar = 5 cm. **b**, Boxplot showing plant heights of different lines as labeled.  $n \geq 8$ . Different letters above bars represent significant differences,  $p < 0.05$ . Statistical analyses were performed with two-tailed Student's *t* tests. Center lines and box edges are medians and the lower/upper quartiles, respectively. Whiskers extend to the lowest and highest data points within  $1.5 \times$  interquartile range (IQR) below and above the lower and upper quartiles, respectively. Exact *n* and *p* values were listed in Supplementary Data.

## Supplementary Figure 2

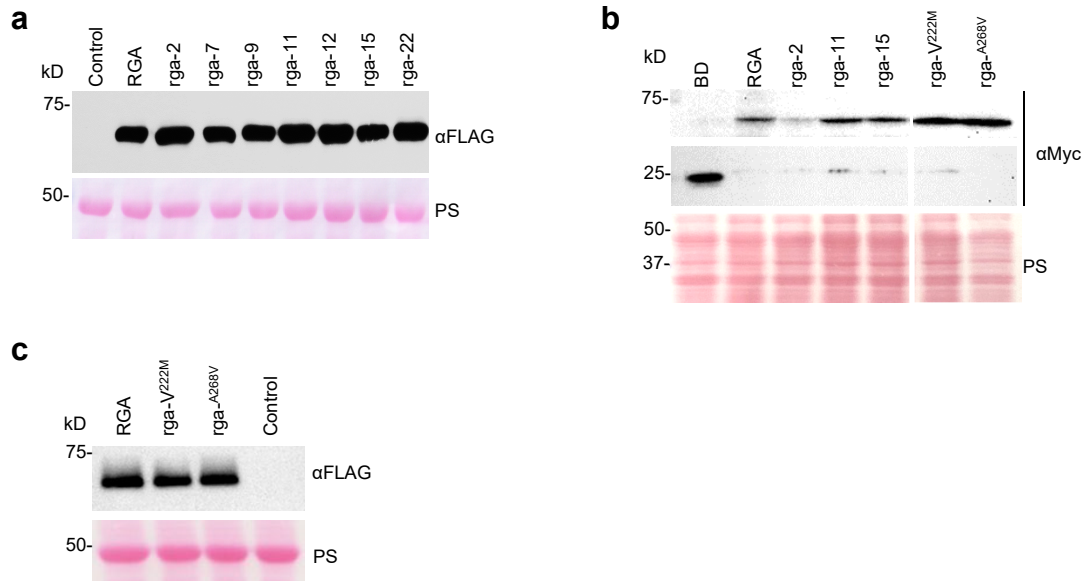

**Supplementary Figure 2.** Detection of RGA and *rga* proteins in Y2H and dual luciferase assays. **a** and **c**, FLAG-RGA/*rga* proteins in *N. benthamiana* extracts were detected by immunoblot analysis using an anti-FLAG antibody. Ponceau S (PS) stained gel images showing similar sample loading. **b**, Myc-Gal4 BD-RGA and -*rga* proteins in yeast extracts were detected by immunoblot analysis using an anti-Myc antibody. Ponceau S (PS) stained gel image showing similar sample loading. Levels of *rga*-11 and *rga*-15 were similar to RGA, *rga*-2 was lower than RGA, and *rga*<sup>V222M</sup> and *rga*<sup>A268V</sup> were higher than RGA. The lower amounts of *rga*-2 may contribute to the reduced growth of *rga*-2 + IDD3 in comparison to other *rga* proteins. In **a-c**, representative images of two biological repeats are shown. Unprocessed gel blot images are in Supplementary Figure 11.

### Supplementary Figure 3

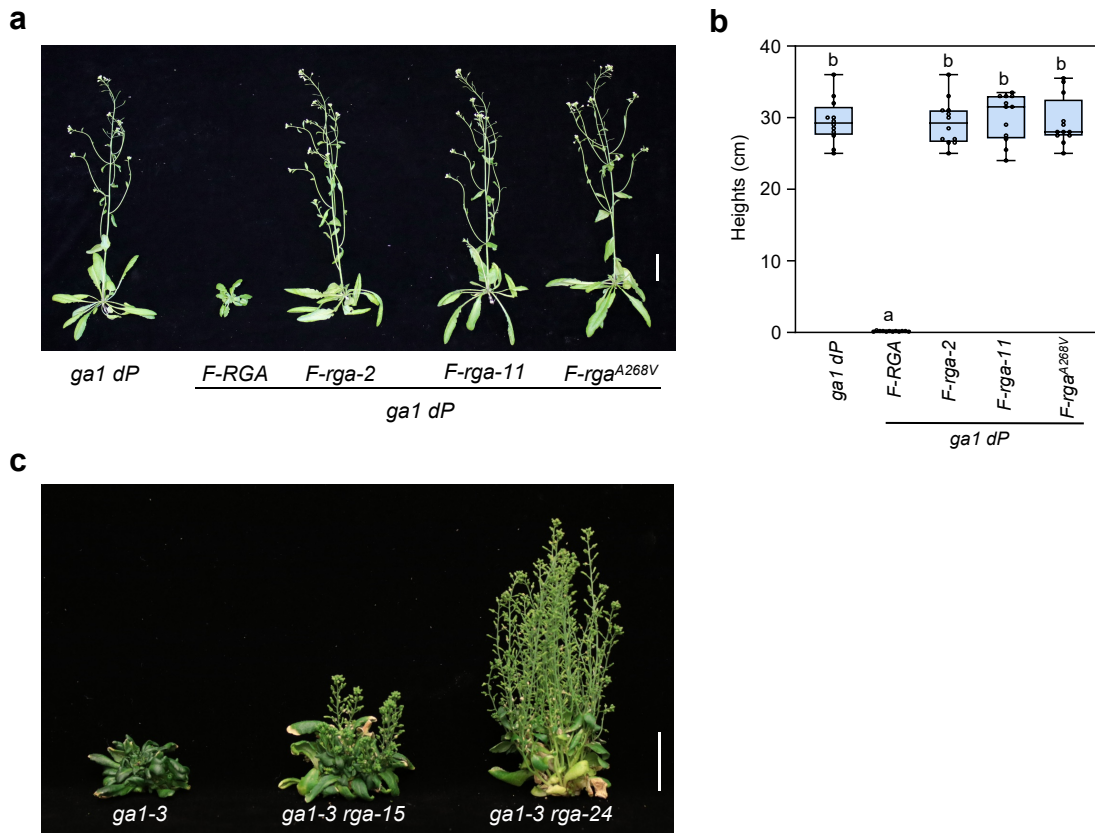

**Supplementary Figure 3. Phenotypes of *gal rga-15* and transgenic lines expressing *F LAG-RGA* or different *FLAG-rga*.** **a**, Phenotypes of  $P_{RGA}:FLAG-rga-2$ ,  $-rga-11$  and  $-rga^{A268V}$  *gal dP* transgenic lines were similar to *gal dP*, whereas  $P_{RGA}:FLAG-RGA$  in *gal dP* restored the dwarf phenotype. All plants were 41-d-old under LD conditions. Bar = 5 cm. **b**, Boxplot showing plant heights of different lines as labeled.  $n = 12$ . Different letters above bars represent significant differences,  $p < 0.01$ . Statistical analyses were performed with two-tailed Student's *t* tests. Center lines and box edges are medians and the lower/upper quartiles, respectively. Whiskers extend to the lowest and highest data points within  $1.5 \times$  in terquartile range (IQR) below and above the lower and upper quartiles, respectively. Exact  $n$  and  $p$  values were listed in Supplementary Data. **c**, *rga-15* only mildly rescued the dwarf phenotype of *gal-3* in comparison to the null *rga-24* allele. Representative 83-d-old *gal-3* (with *RGA*) and *gal rga* mutants as labeled. Bar = 2 cm.

## Supplementary Figure 4

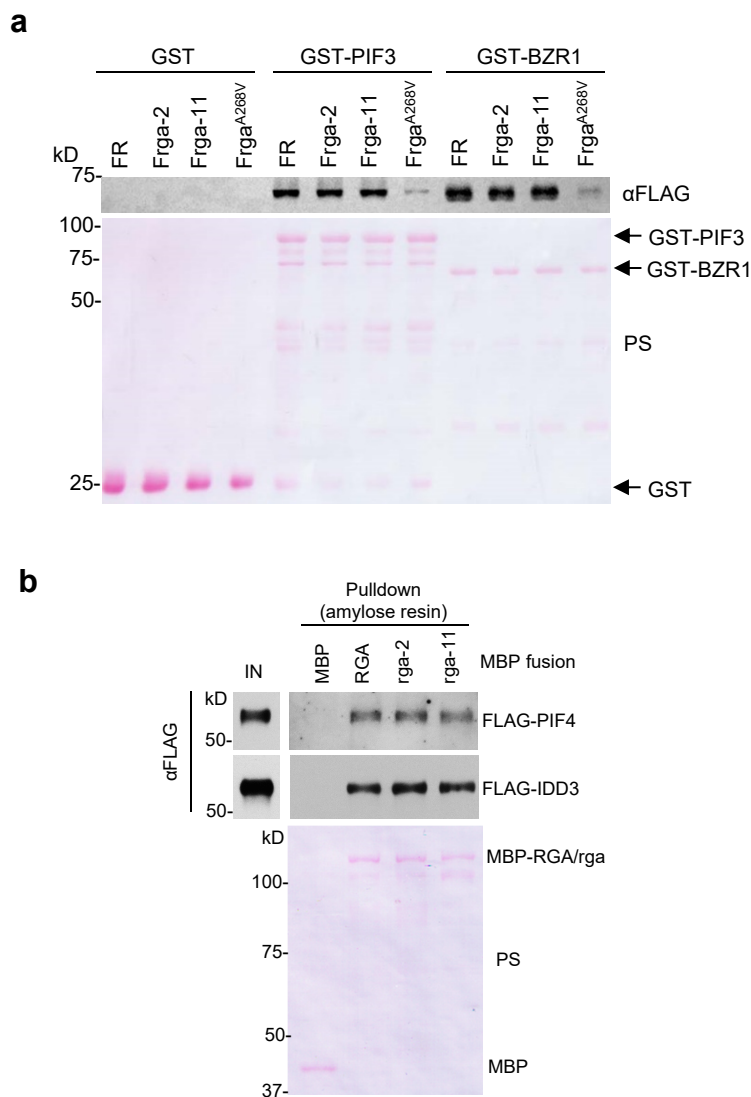

**Supplementary Figure 4. In vitro pull-down assays to examine RGA/rga interaction with TFs.** **a**, The images of Ponceau S-stained blots show the GST and GST-BZR1, GST-PIF3 proteins used in the pull-down assays in Fig. 4a. **b**, In vitro pull-down assay. Recombinant MBP, MBP-RGA, MBP-rga-2, MBP-rga-11 bound to amylose resin were used separately to pull down FLAG-PIF4 or FLAG-IDD3 from protein extracts from *N. benthamiana*. Immunoblots containing input plant extracts and pull-down samples were detected with an anti-FLAG antibody. Ponceau S (PS)-stained blots indicated that similar amounts of the MBP/MBP-fusion proteins were used in each set of the pull-down assays. In **a-b**, representative images of three (in **a**) or two (in **b**) biological repeats are shown. Unprocessed gel blot images are in Supplementary Figure 11.

## Supplementary Figure 5

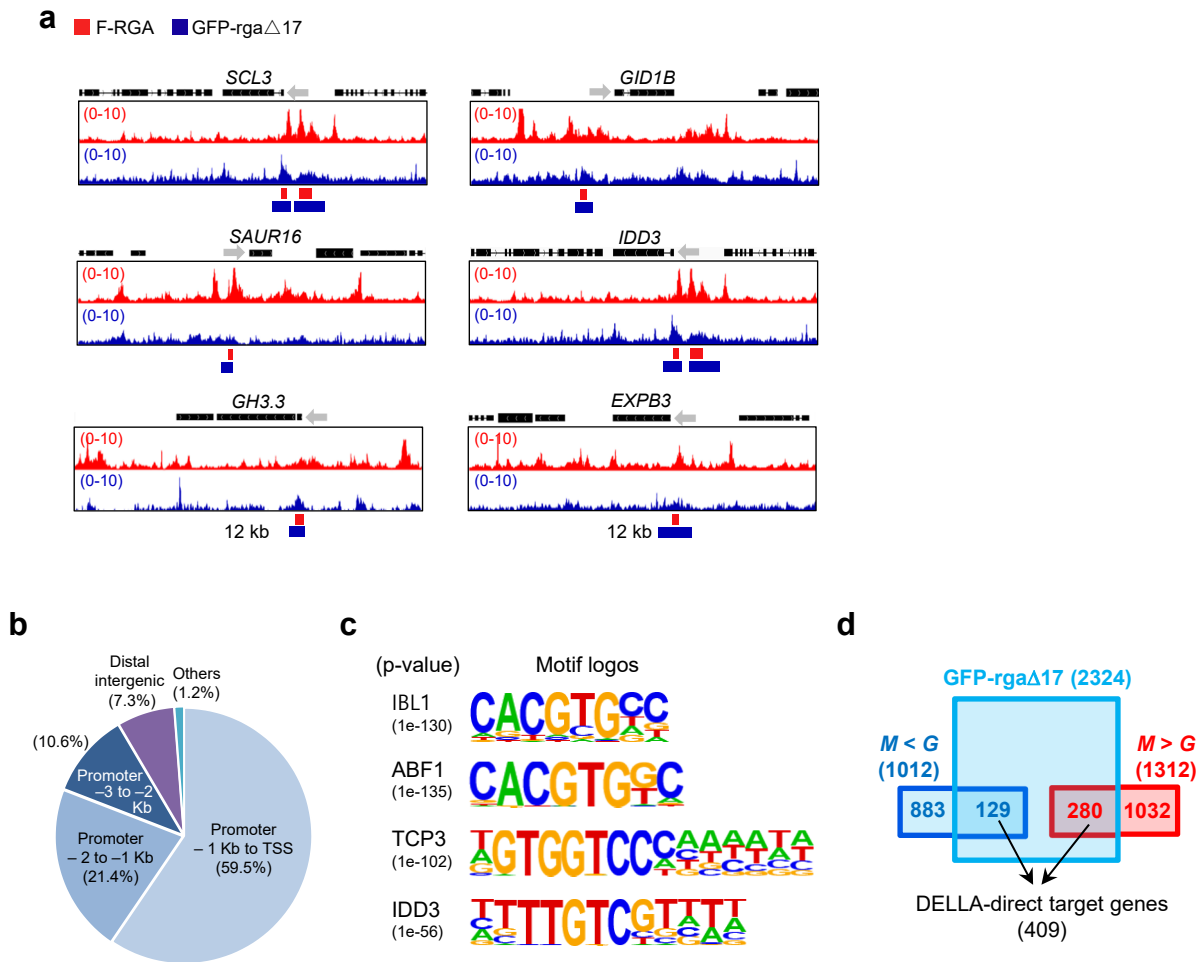

**Supplementary Figure 5. Additional ChIP-Seq data.** **a**, Genome browser views of F-RGA and GFP-rga $\Delta$ 17 ChIP-seq binding profiles at selected loci (12 kb region is shown in each panel). Gene structures and names are above each panel. Red bars and blue bars below indicate F-RGA and GFP-rga $\Delta$ 17 binding peaks, respectively. The data range of y-axis is 0-10. **b**, Genomic distribution of FLAG-RGA binding peaks. Promoter regions [-3 kb to transcription start site (TSS)] were divided into three segments as labeled. Others include exon, intron, downstream and 3' UTR. **c**, Most highly enriched *cis*-elements for IBL1 (bHLH), ABF1 (bZIP), TCP3 (TCP), IDD3 (IDD) near the binding peaks of FLAG-RGA. **d**, RGA-direct target genes based on overlapping genes between genes located near a GFP-rga $\Delta$ 17 peak and GA-responsive genes (based on an RNA-seq dataset<sup>37</sup>) (see Methods for detail). M, mock treatment. G, GA treatment.  $M < G$  (GA-upregulated genes) and  $M > G$  (GA-downregulated genes). RGA acts as 'direct repressor' and 'direct activator' on 129 and 280 genes, respectively. The list of all RGA-direct target genes is in **Supplementary Table 3**.

## Supplementary Figure 6

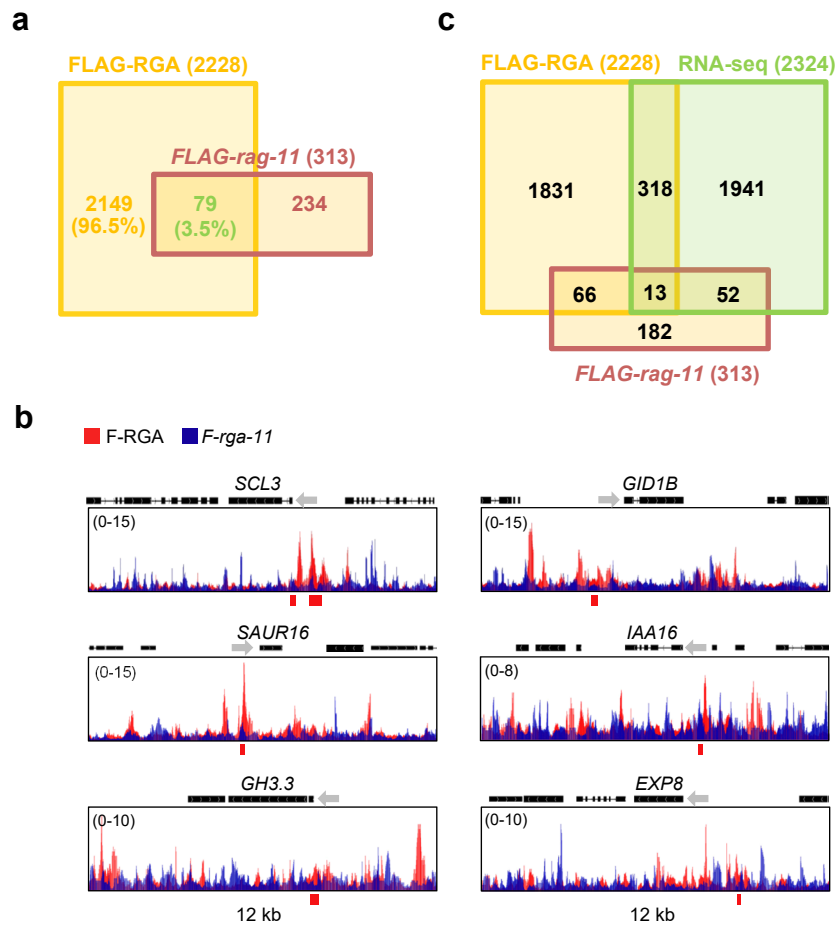

**Supplementary Figure 6. FLAG-*rga-11* showed much reduced chromatin binding in comparison to F-RGA by ChIP-seq analysis. a**, Venn diagram showing the overlap between genes adjacent to the binding sites of F-RGA and F-*rga-11*. **b**, Genome browser views of F-RGA and F-*rga-11* ChIP-seq binding profiles at selected RGA target genes (12 kb region is shown in each panel). F-RGA and F-*rga-11* tracks are overlaid. Red bars below indicate differential RGA binding peaks. The data range of y-axis as shown in the left corner of each image. **c**, A Venn diagram showing the overlap among genes adjacent to the binding sites of F-RGA, F-*rga-11*, and GA-responsive genes (based on an RNA-Seq dataset<sup>37</sup>).

## Supplementary Figure 7

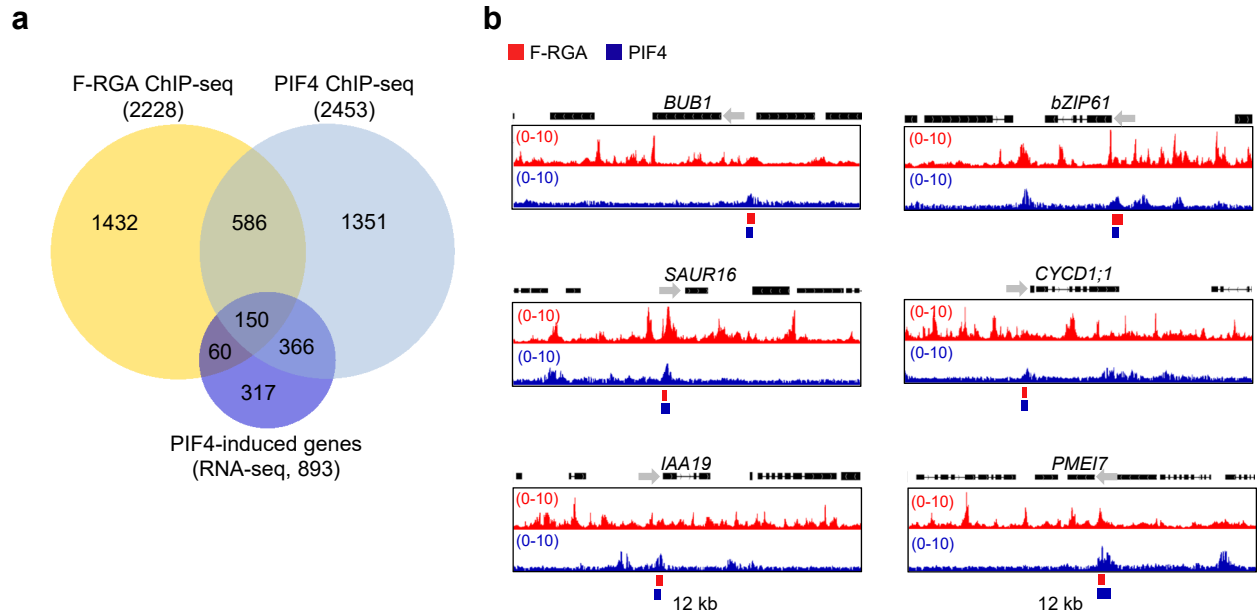

**Supplementary Figure 7. High degree of co-localization of RGA and PIF4 binding peaks associated with PIF-induced genes.** **a**, Venn diagram showing the overlap among genes adjacent to the binding sites of FLAG-RGA (this study), PIF4 (ChIP-seq dataset<sup>53</sup>) and PIF4-induced genes (RNA-seq dataset<sup>53</sup>). **b**, Genome browser views of FLAG-RGA and PIF4 binding peak regions at selected genes. Gene structures and names are shown above each panel. Red bars and blue bars below the panels indicate F-RGA and PIF4 binding peak regions, respectively. Data range as shown in the left corner of each image.

## Supplementary Figure 8

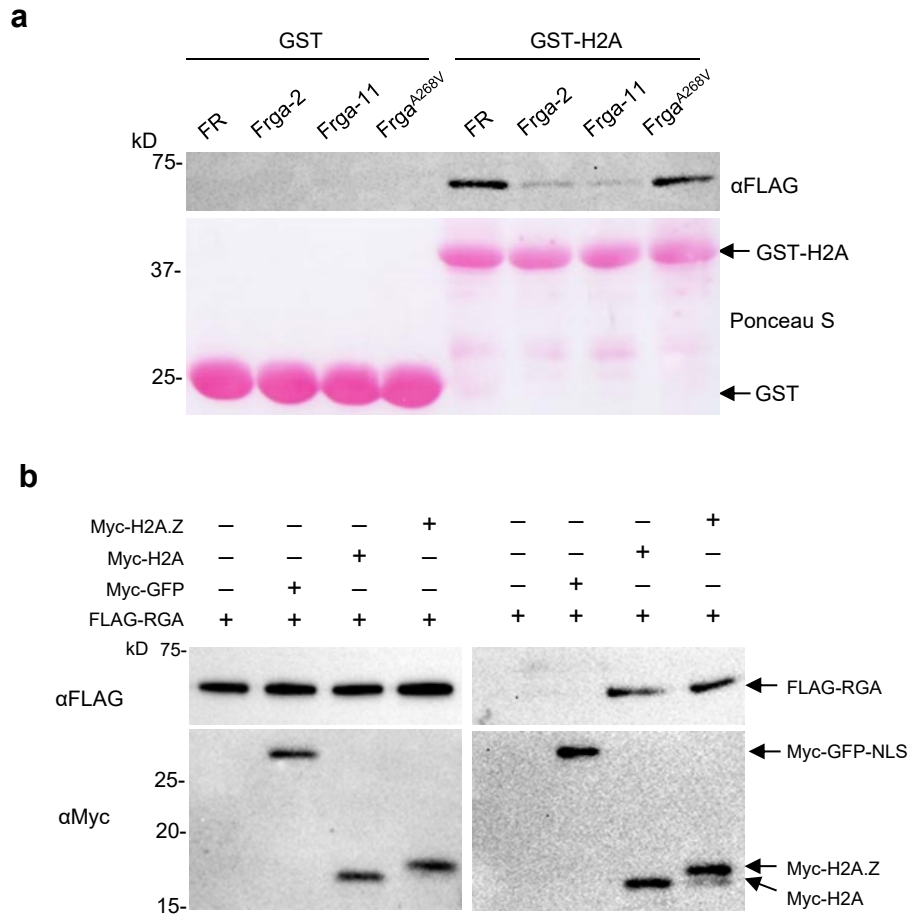

**Supplementary Fig. 8. Pull-down and co-IP assays.** **a**, The image of Ponceau S-stained blot shows the GST and GST-H2A proteins used in the pull-down assays in Fig. 7c. **b**, Co-IP assay showing RGA interacts with H2A and H2A.Z similarly. FLAG-RGA was expressed alone or co-expressed with Myc-H2A, Myc-H2A.Z or Myc-GFP-NLS in *N. benthamiana* as indicated. An anti-Myc antibody was used for IP, and protein blots were probed with anti-Myc and anti-FLAG antibodies, separately. In **a-b**, representative images of three (in **a**) or two (in **b**) biological repeats are shown. Unprocessed gel blot images are in Supplementary Figure 11.



## Supplementary Figure 9

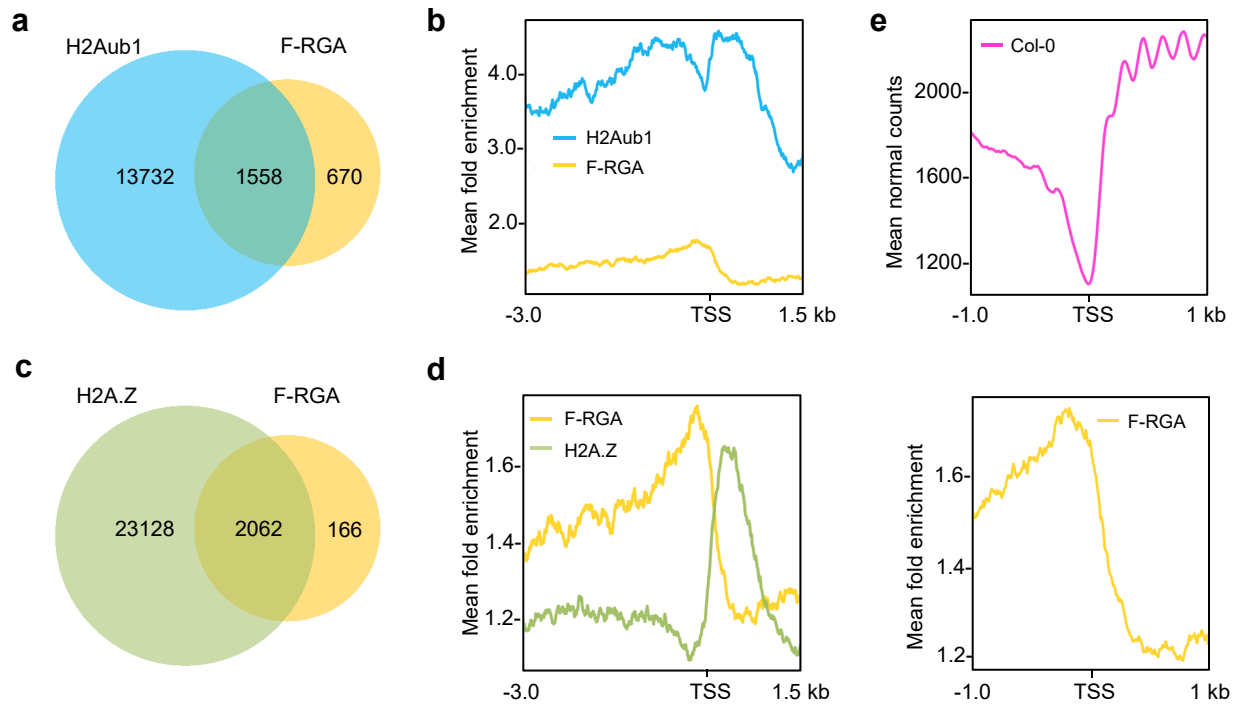

**Supplementary Figure 9. Genome-wide RGA binding peaks do not co-localize with peaks of H2Aub1, H2A.Z or +1 nucleosome.** **a** and **c**, Venn diagrams showing the overlap between genes adjacent to the binding peaks of FLAG-RGA (current study) and H2Aub1 or H2A.Z (published ChIP-seq datasets). **b**, Genome-wide relative enrichment of RGA vs H2Aub1 binding peaks among the 1558 overlapping genes identified in **a**. **d**, Genome-wide relative enrichment of RGA vs H2A.Z binding peaks among the 2062 overlapping genes identified in **c**. **e**, RGA binding peak does not co-localize with +1 nucleosome. Top panel, Metagene plots showing nucleosome positioning in  $-1$  kb to  $+1$  kb regions around TSS (using published MNase-seq dataset). Bottom panel, Genome-wide relative enrichment of RGA binding peaks in  $-1$  kb to  $+1$  kb regions around TSS.

## Supplementary Figure 10

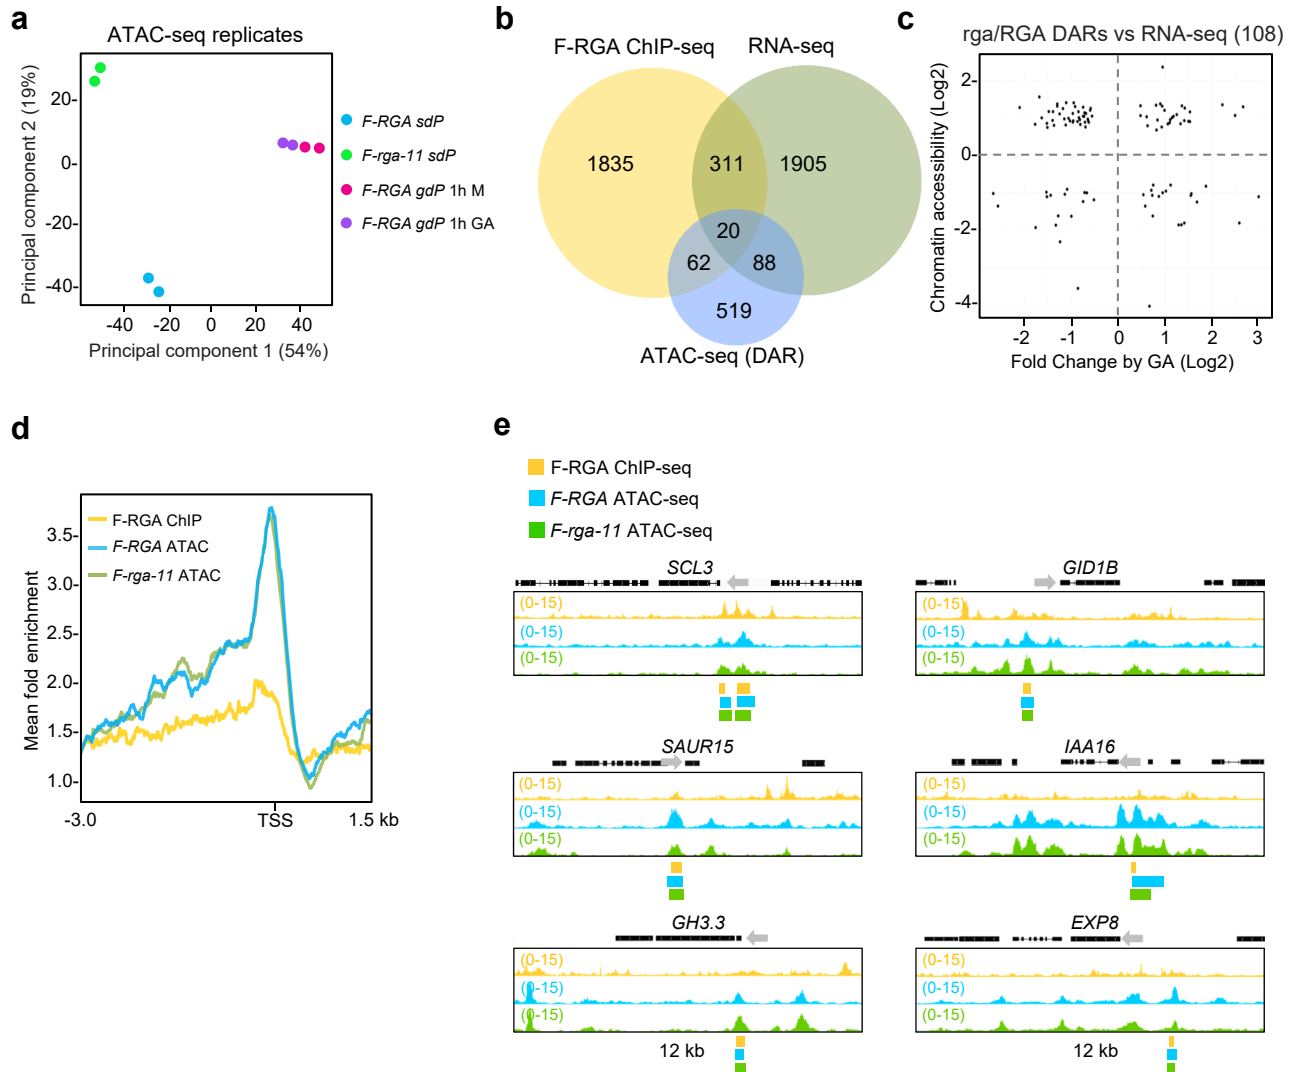

**Supplementary Figure 10. Relative chromosome accessibility in *FLAG-RGA* and *FLAG-rga-11* (in *sly1 dP* background) by ATAC-seq. **a**, PCA analysis of 2 biological replicates of ATAC-seq experiment using *F-RGA sly1 dP*, *F-rga-11 sly1 dP*, *F-RGA gal dP* (1h mock) and *F-RGA gal dP* (1mM GA<sub>4</sub> for 1h). **b**, Venn diagram showing the overlap among genes adjacent to the binding sites of FLAG-RGA (this study), GA-responsive genes from RNA-seq, and DARs from *F-rga-11/F-RGA* ATAC-seq (this study). We did not include *F-RGA gal dP* (1h mock) and *F-RGA gal dP* (1h GA) in further data analysis because comparison between these ATAC-seq samples did not identify any DAR. **c**, No correlation between chromatin accessibility (*F-rga-11* vs *F-RGA*) and GA responsiveness. Scatter plot containing 108 genes that are near DARs (*F-rga-11/RGA* ATAC-seq) and are GA-responsive. **d**, Overall relative enrichment of F-RGA binding vs chromatin accessibility in *F-RGA* and in *F-rga-11*. The 311 RGA direct target genes that were absent in DARs in *F-rga-11/F-RGA* ATAC-seq were used in this analysis. **e**, Genome browser views of F-RGA ChIP-seq binding vs. chromatin accessibility profiles at selected loci (12 kb region is shown in each panel). Gene structures and names are above each panel. Yellow bar below indicates F-RGA binding peaks. Blue and green bars below indicate accessibility ATAC-seq peaks in *F-RGA* and *F-rga-11* lines, respectively. The data range of y-axis is 0-15.**

## Supplementary Figure 11. Unprocessed gel blot images for Supplementary Figures 2, 4 and 8.

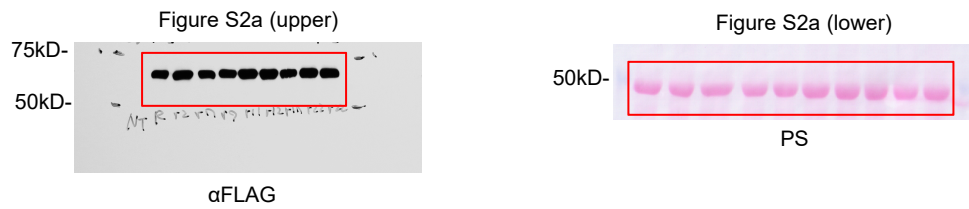

**Original Western blots for Figure S2.** Boxed areas indicate the lanes/protein bands shown in Figure S2a.

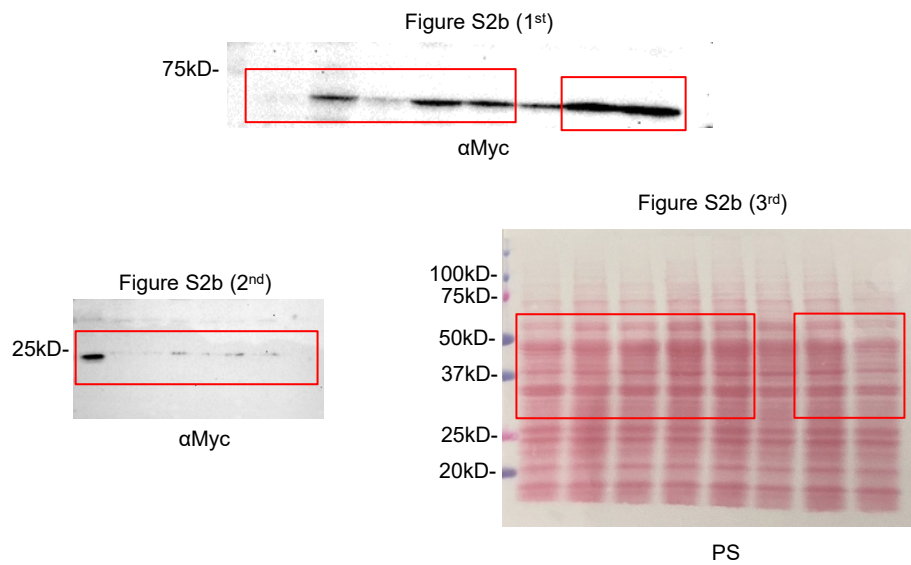

**Original Western blots for Figure S2.** Boxed areas indicate the lanes/protein bands shown in Figure S2b.

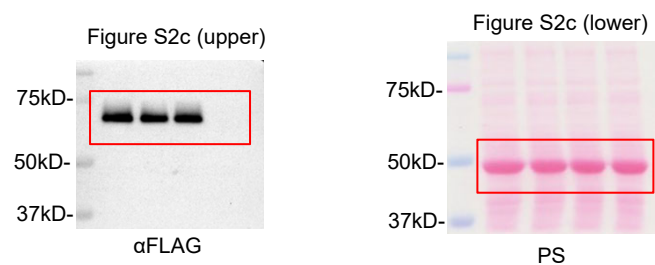

**Original Western blots for Figure S2.** Boxed areas indicate the lanes/protein bands shown in Figure S2c.

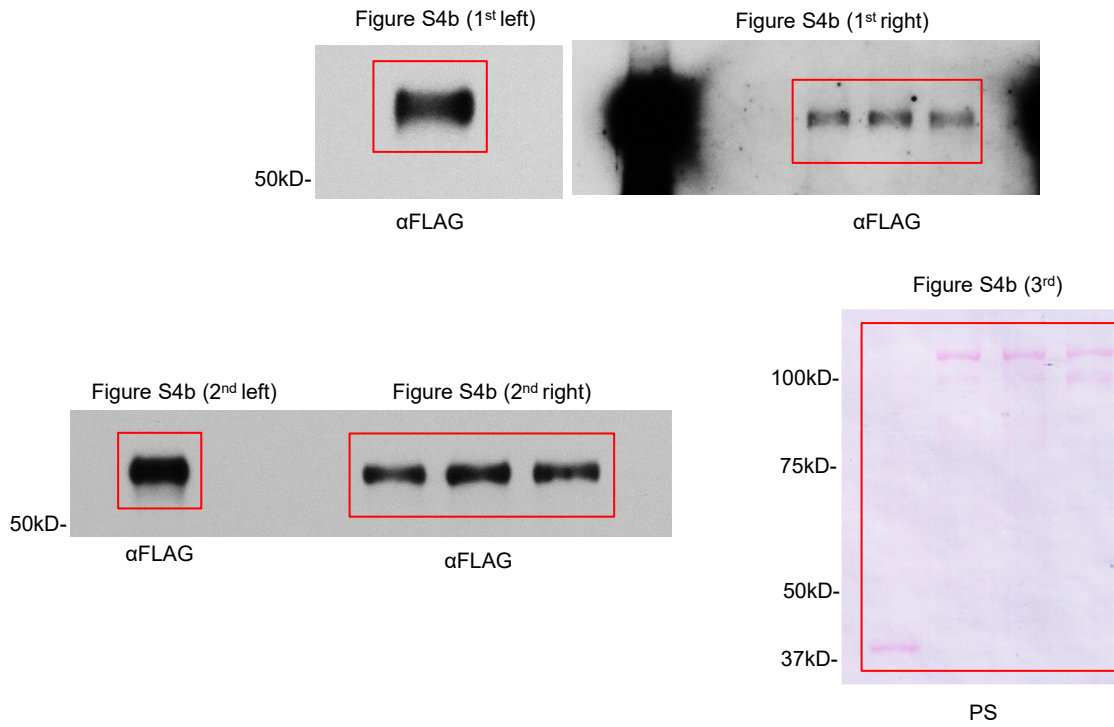

**Original Western blots for Figure S4.** Boxed areas indicate the lanes/protein bands shown in Figure S4b.

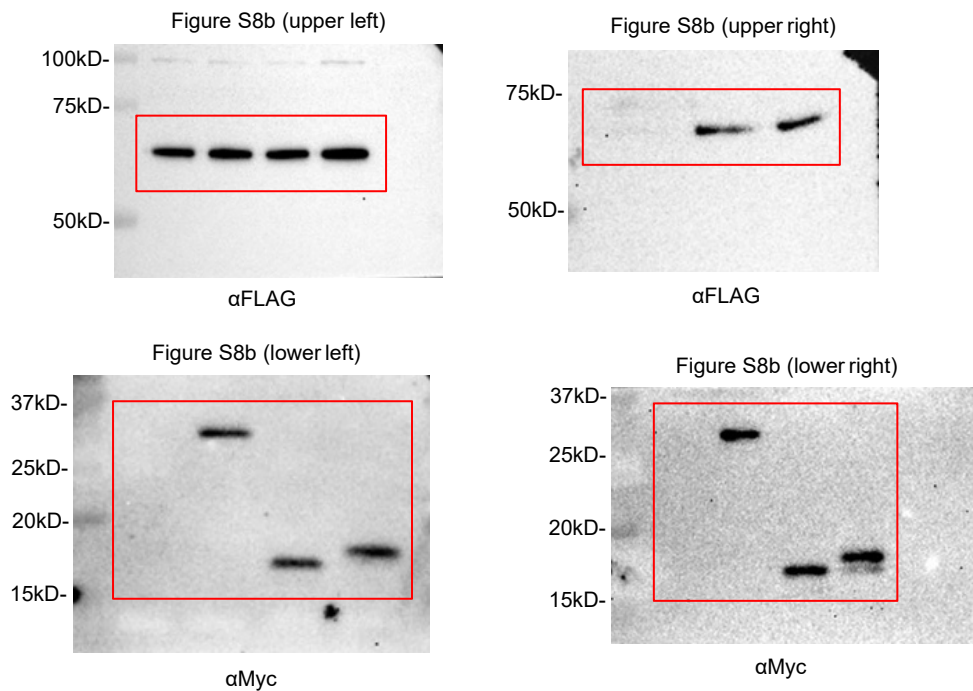

**Original Western blots for Figure S8.** Boxed areas indicate the lanes/protein bands shown in Figure S8b.
